# Supplementary material
Source: Research Square preprint supplement (doi:10.21203/rs.3.rs-9568099/v1)
Supplement: Supplementary file 1 [file 344e269c6d4439ea0f5ef871.docx]

**Supplementary material**


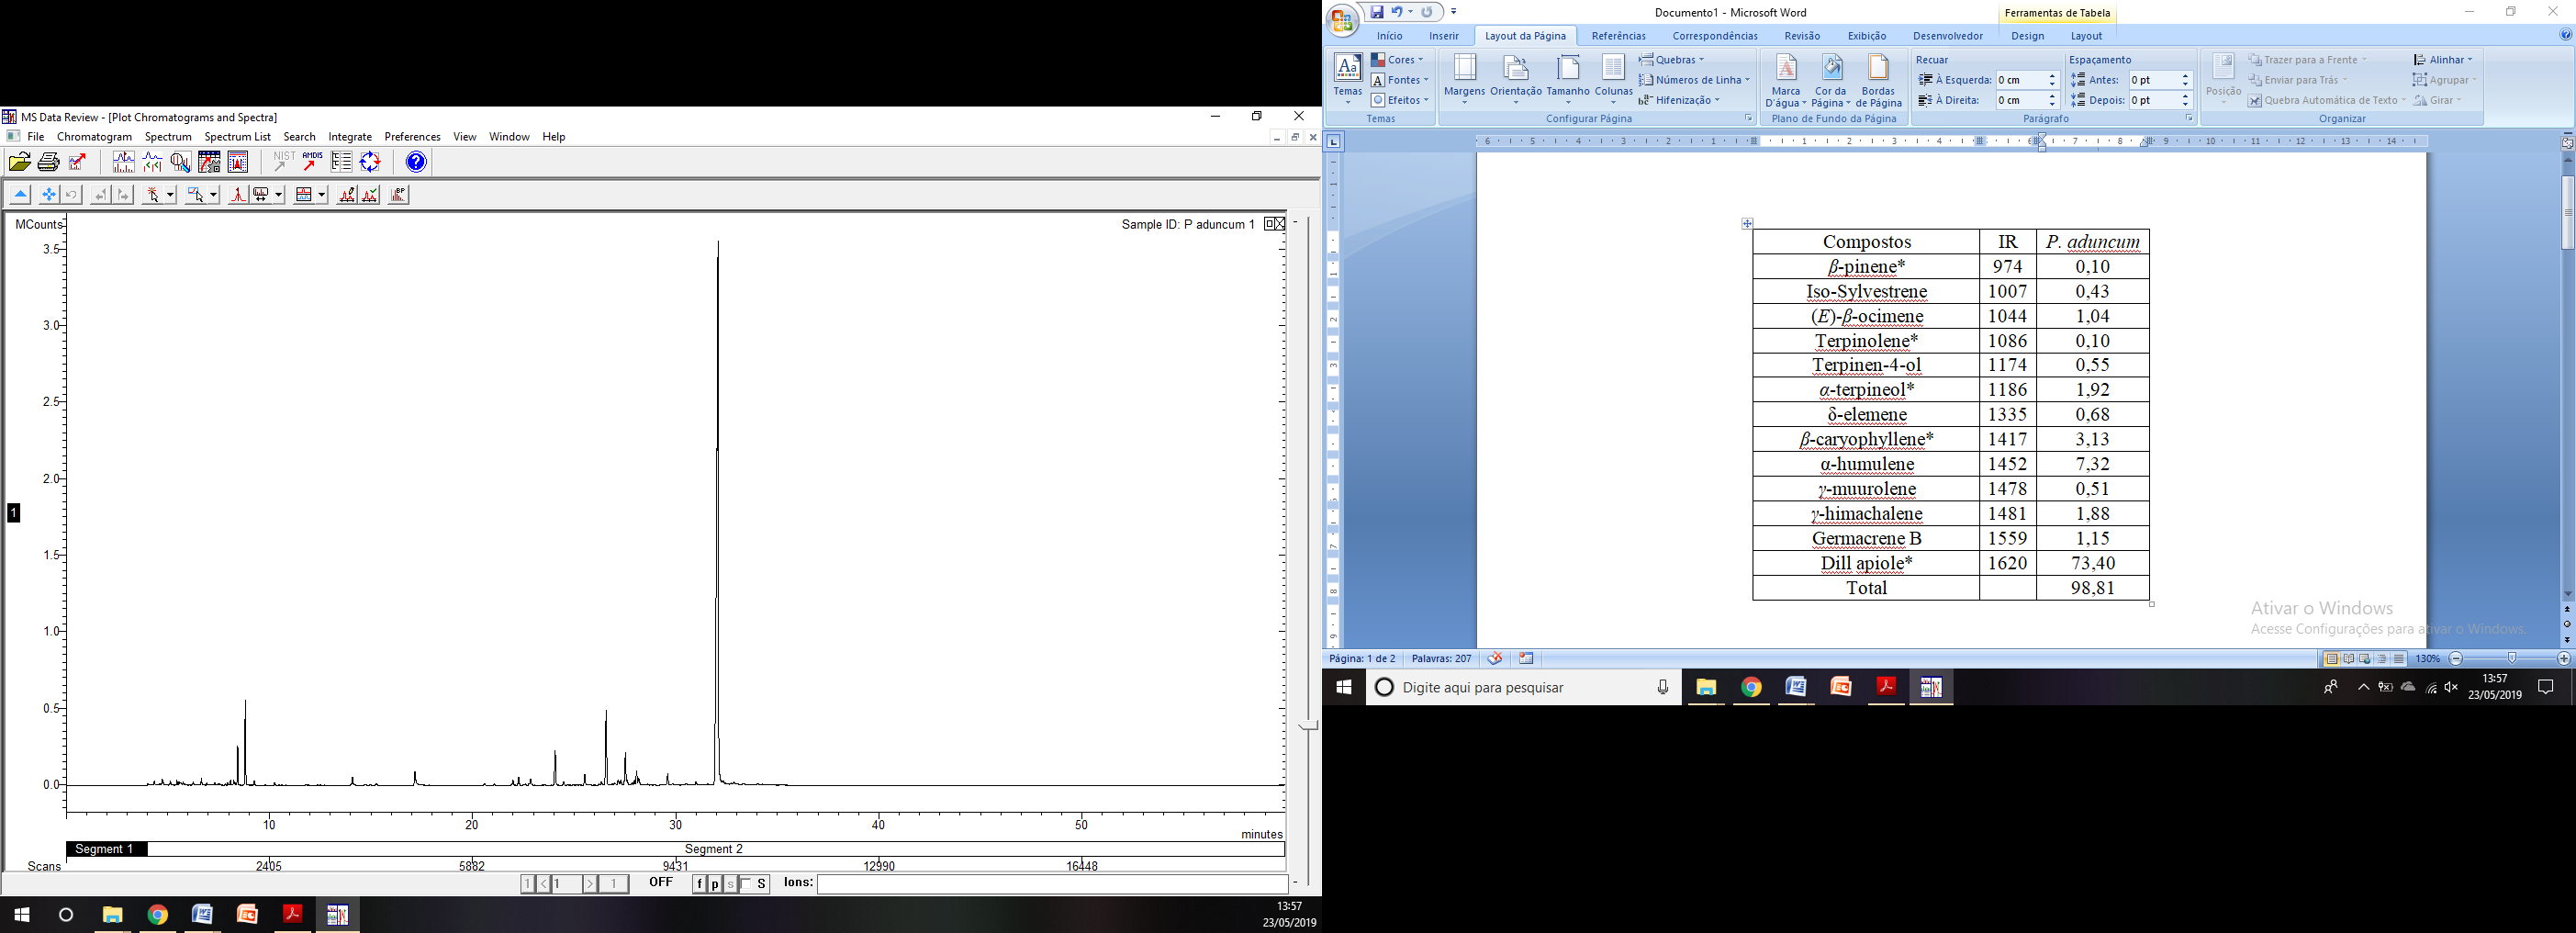


**Figure 1.** Chromatogram of the essential oil of *Piper aduncum.*

**Figure 2.** Chromatogram of the essential oil of *Carum carvi.*


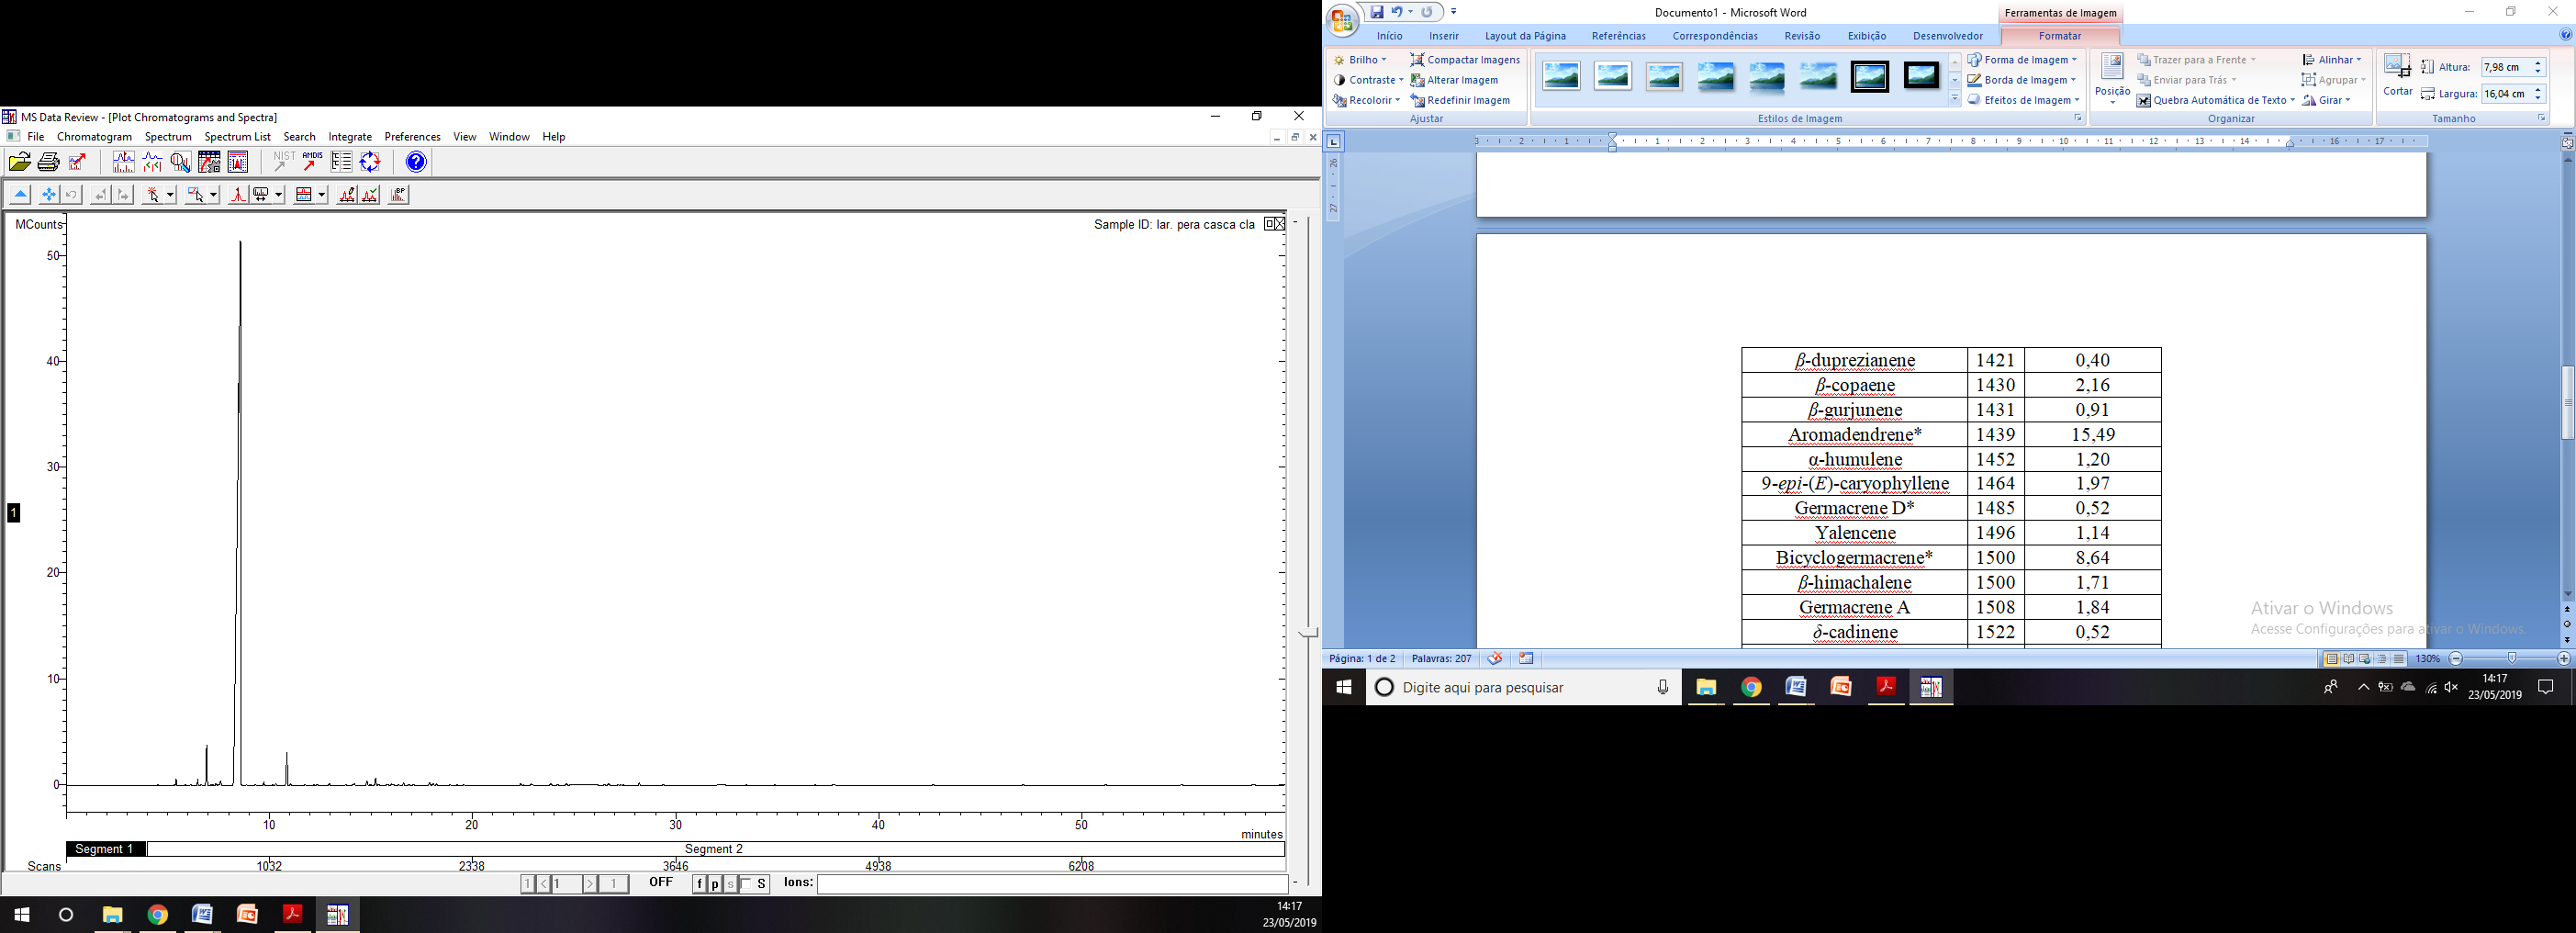


**Figure 3.** Chromatogram of the essential oil of *Citrus sinensis.*
